# Supplementary material for: Structural design and evolution of a novel Bi3+-doped narrow-band emission blue phosphor with excellent photoluminescence performance for wide color gamut wLED
Source: Royal Society of Chemistry journal article supplement (doi:10.1039/d1tc03130a), 2021-01-01
Supplement: d1tc03130a1.pdf [file d1tc03130a1.pdf]

## Supporting Information

### Structural design and evolution of a novel Bi<sup>3+</sup> doped narrow-band emission blue phosphor with excellent photoluminescence performance for wide color gamut wLED

Siqi Piao<sup>a</sup>, Yichao Wang<sup>\*a</sup>, Ge Zhu<sup>b</sup>, Jinsu Zhang<sup>a</sup>, Xizhen Zhang<sup>a</sup>, Danyang Wu<sup>a</sup>, Yongze Cao<sup>a</sup>,  
Xiangping Li<sup>a</sup>, Baojiu Chen<sup>\*a</sup>

<sup>a</sup>College of Science, Dalian Maritime University, Dalian 116026, China

Email: [wangyc2020@dlnu.edu.cn](mailto:wangyc2020@dlnu.edu.cn); [chenmbj@sohu.com](mailto:chenmbj@sohu.com)

<sup>b</sup>Key Laboratory of New Energy and Rare Earth Resource Utilization of State Ethnic Affairs Commission, Key Laboratory of Photosensitive Materials & Devices of Liaoning Province, College of Physics and Materials Engineering, Dalian Minzu University, 18 Liaohe West Road, Dalian, 116600, P. R. China.

Email : zhuge06@126.com

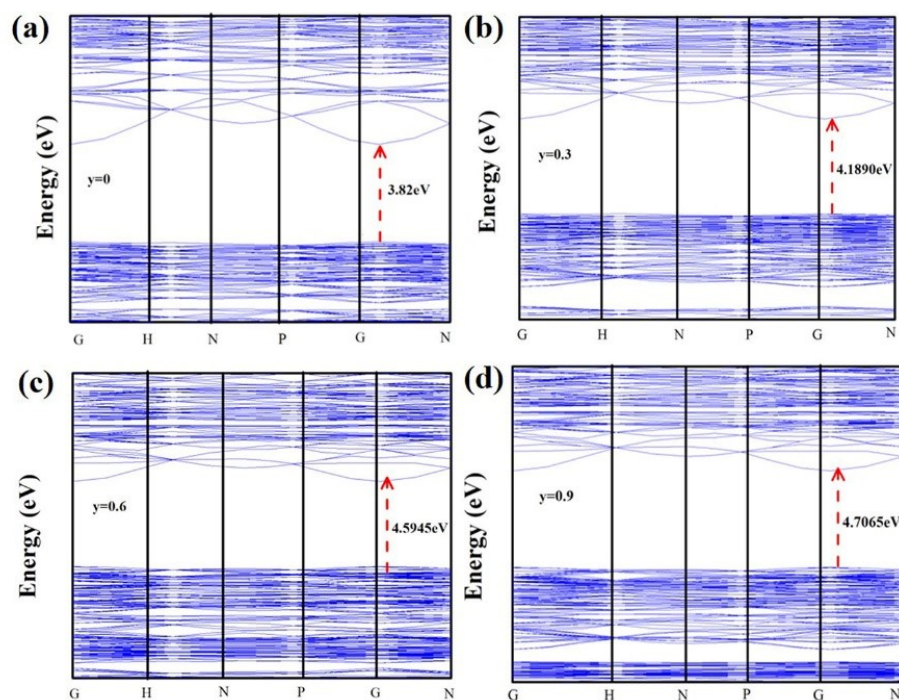

**Fig. S1** Energy band structure of  $\text{Ca}_4\text{HfGe}_{3-y}\text{Si}_y\text{O}_{12}$  ( $y=0, 0.3, 0.6, 0.9$ ) based on the DFT calculation.

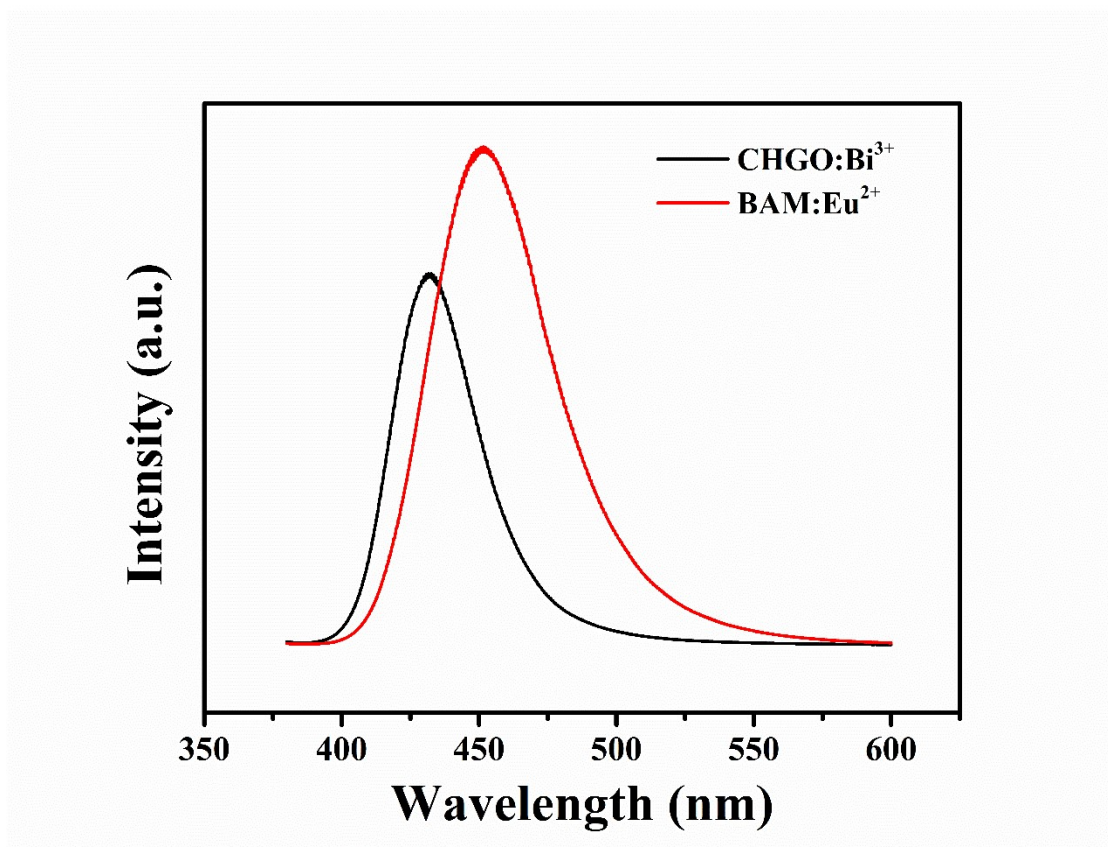

**Fig. S2** PL spectra of  $\text{Ca}_4\text{HfGe}_3\text{O}_{12}: 0.02\text{Bi}^{3+}$  and commercial BAM:  $\text{Eu}^{2+}$  under the excitation of 369 nm
